# Supplementary material
Source: PubMed Central journal article supplement (PMC2770657)
Supplement: gkp671_1.pdf [file gkp671_1.pdf]

**Figure S1.** Oligonucleotide substrates used in this study.

### PST substrates

**PST0-65:** (T)<sub>n</sub> -CGAATTCGAGCTCGGTACCC  
GCTTAAGCTCGAGCCATGGG

### Forked substrates

**PST55-C10-55:** (T)<sub>55</sub>  
CGAATTCGAGCTCGGTACCC  
GCTTAAGCTCGAGCCATGGG  
(C)<sub>n</sub>

### Gapped substrates

**PST55-Gap0-30:** TTCGAAACGTGCGCGCCCAT (T)<sub>55</sub> CGAATTCGAGCTCGGTACCC  
AAGCTTTGCACGCGCGGGTA- (T)<sub>n</sub> -GCTTAAGCTCGAGCCATGGG

**ds55-Gap0-30:**

ACACCGTTGCCGGTTTTTCAAGCGGGAAAAACAAAATCACCGTTAAGCTTGGCGT  
TGTGGCAACGGCCAAAAGTTCGCCCTTTTGGTTTTAGTGGCAATTCGAACCGCA CGAATTCGAGCTCGGTACCC  
TTCGAAACGTGCGCGCCCAT GCTTAAGCTCGAGCCATGGG  
AAGCTTTGCACGCGCGGGTA- (T)<sub>n</sub> -

### Other substrates

**ds60:** TTCGAAACGTGCGCGCCCATAAAAAAAAAAAAAAAAAAAAACGAATTCGAGCTCGGTACCC  
AAGCTTTGCACGCGCGGGTATTTTTTTTTTTTTTTTTTTTTTTTGGCTTAAGCTCGAGCCATGGG

**T20ds40:** TTTTTTTTTTTTTTTTTTTTTTTTTCGAAACGTGCGCGCCCATCGAATTCGAGCTCGGTACCC  
AAGCTTTGCACGCGCGGGTAGCTTAAGCTCGAGCCATGGG

**PST15-Gap20:** TTCGAAACGTGCGCGCCCAT (T)<sub>15</sub> CGAATTCGAGCTCGGTACCC  
AAGCTTTGCACGCGCGGGTATTTTTTTTTTTTTTTTTTTTTTTTGGCTTAAGCTCGAGCCATGGG
