# Supplementary material
Source: PubMed Central journal article supplement (PMC2770657)
Supplement: gkp671_3.pdf [file gkp671_3.pdf]

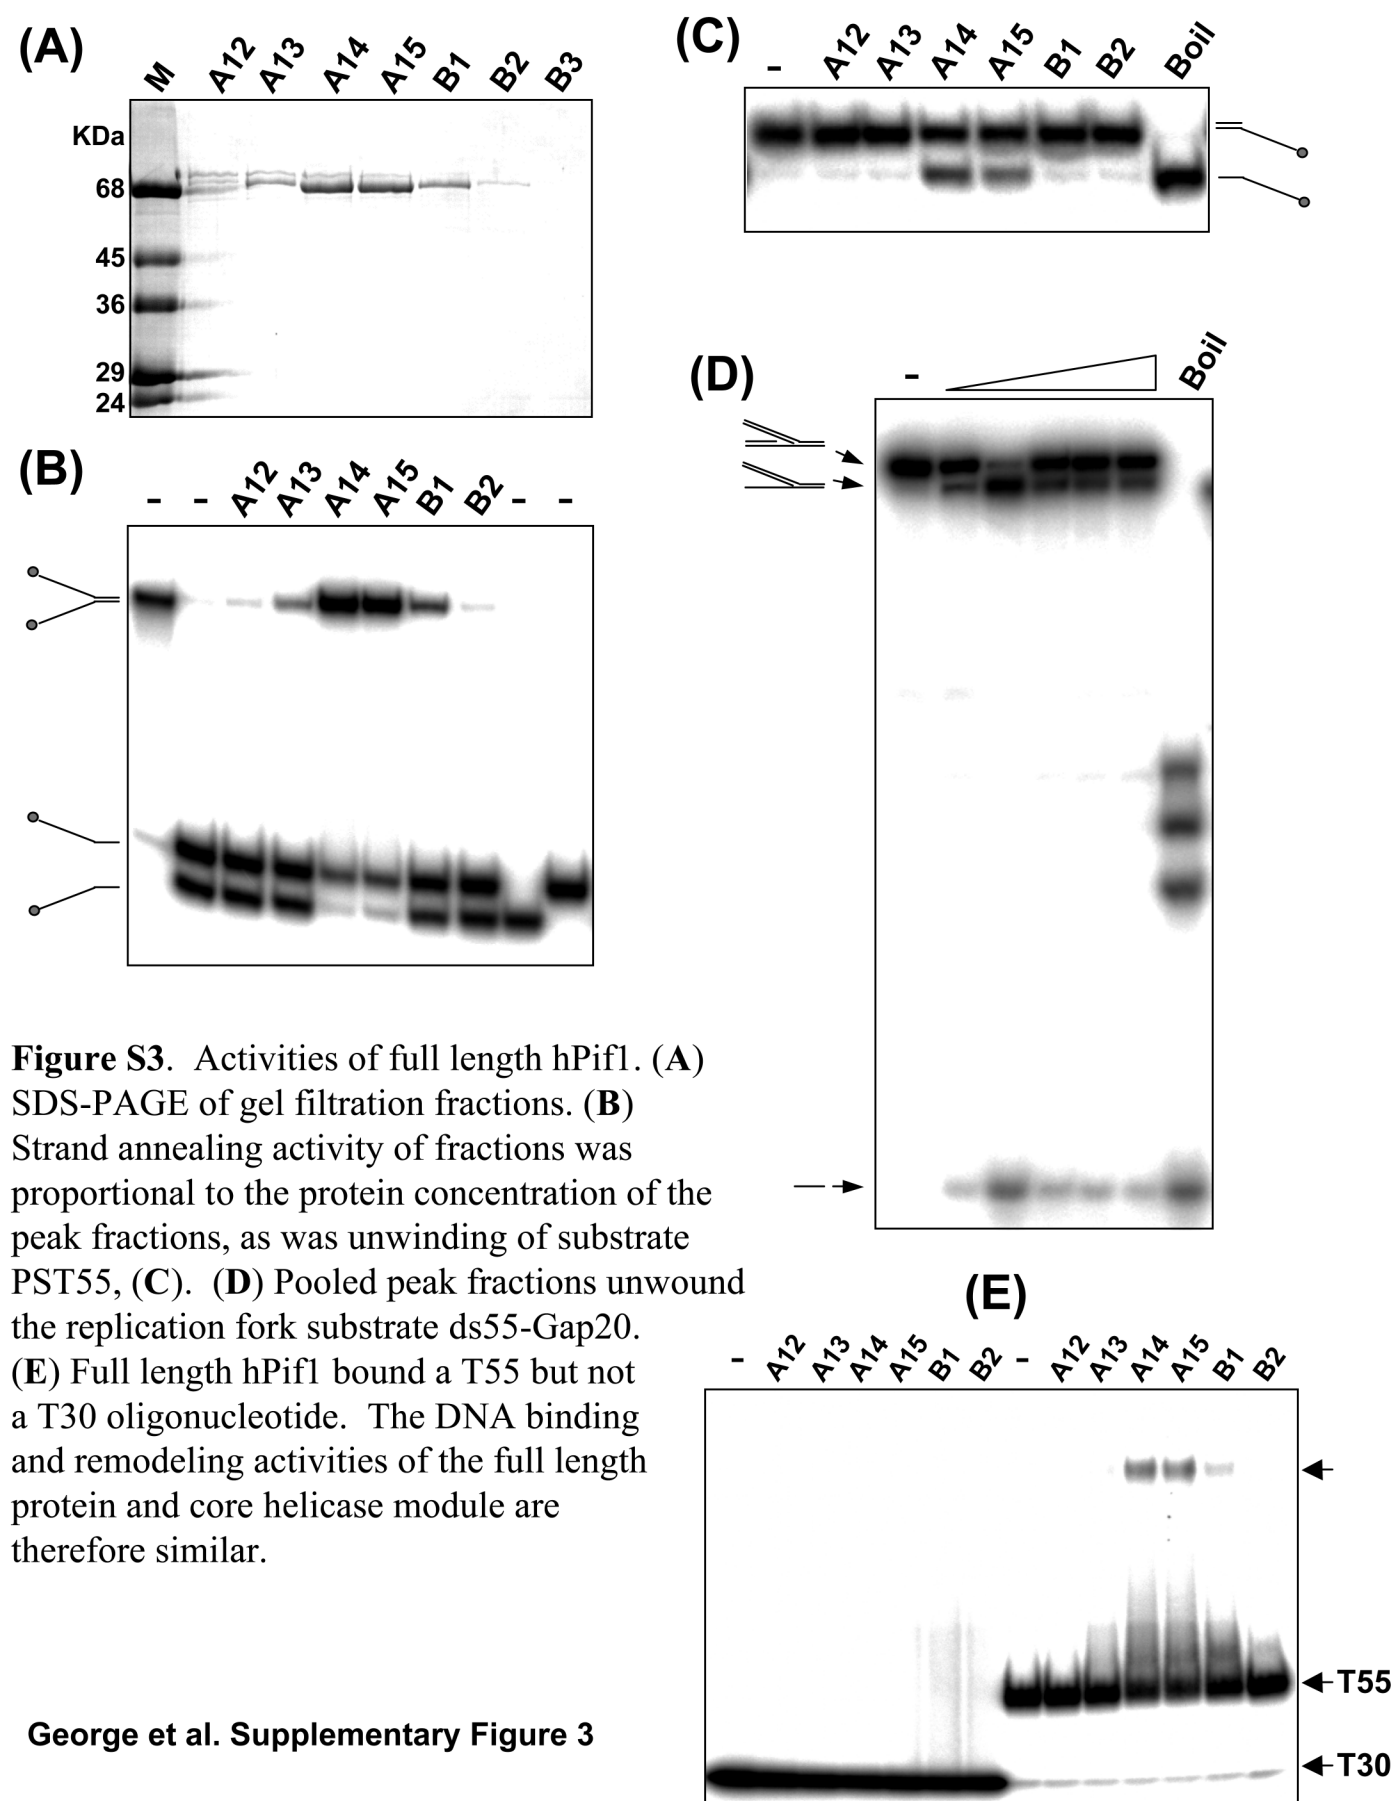

**Figure S3.** Activities of full length hPif1. **(A)** SDS-PAGE of gel filtration fractions. **(B)** Strand annealing activity of fractions was proportional to the protein concentration of the peak fractions, as was unwinding of substrate PST55, **(C)**. **(D)** Pooled peak fractions unwound the replication fork substrate ds55-Gap20. **(E)** Full length hPif1 bound a T55 but not a T30 oligonucleotide. The DNA binding and remodeling activities of the full length protein and core helicase module are therefore similar.
